# Supplementary material for: SQSTM-1/p62 potentiates HTLV-1 Tax-mediated NF-κB activation through its ubiquitin binding function
Source: PubMed Central journal article supplement (PMC6831704; doi:10.1038/s41598-019-52408-x), 2019-11-05

**SQSTM-1/p62 potentiates HTLV-1 Tax-mediated NF- $\kappa$ B activation through its  
ubiquitin binding function**

Aurélien Schwob, Elodie Teruel, Louise Dubuisson, Florence Lormières, Pauline Verlhac, Yakubu Princely Abudu, Janelle Gauthier, Marie Naoumenko, Fanny-Meï Cloarec-Ung, Mathias Faure, Terje Johansen, H el ene Dutartre, Renaud Mahieux, Chlo e Journo

**Supplementary figures**

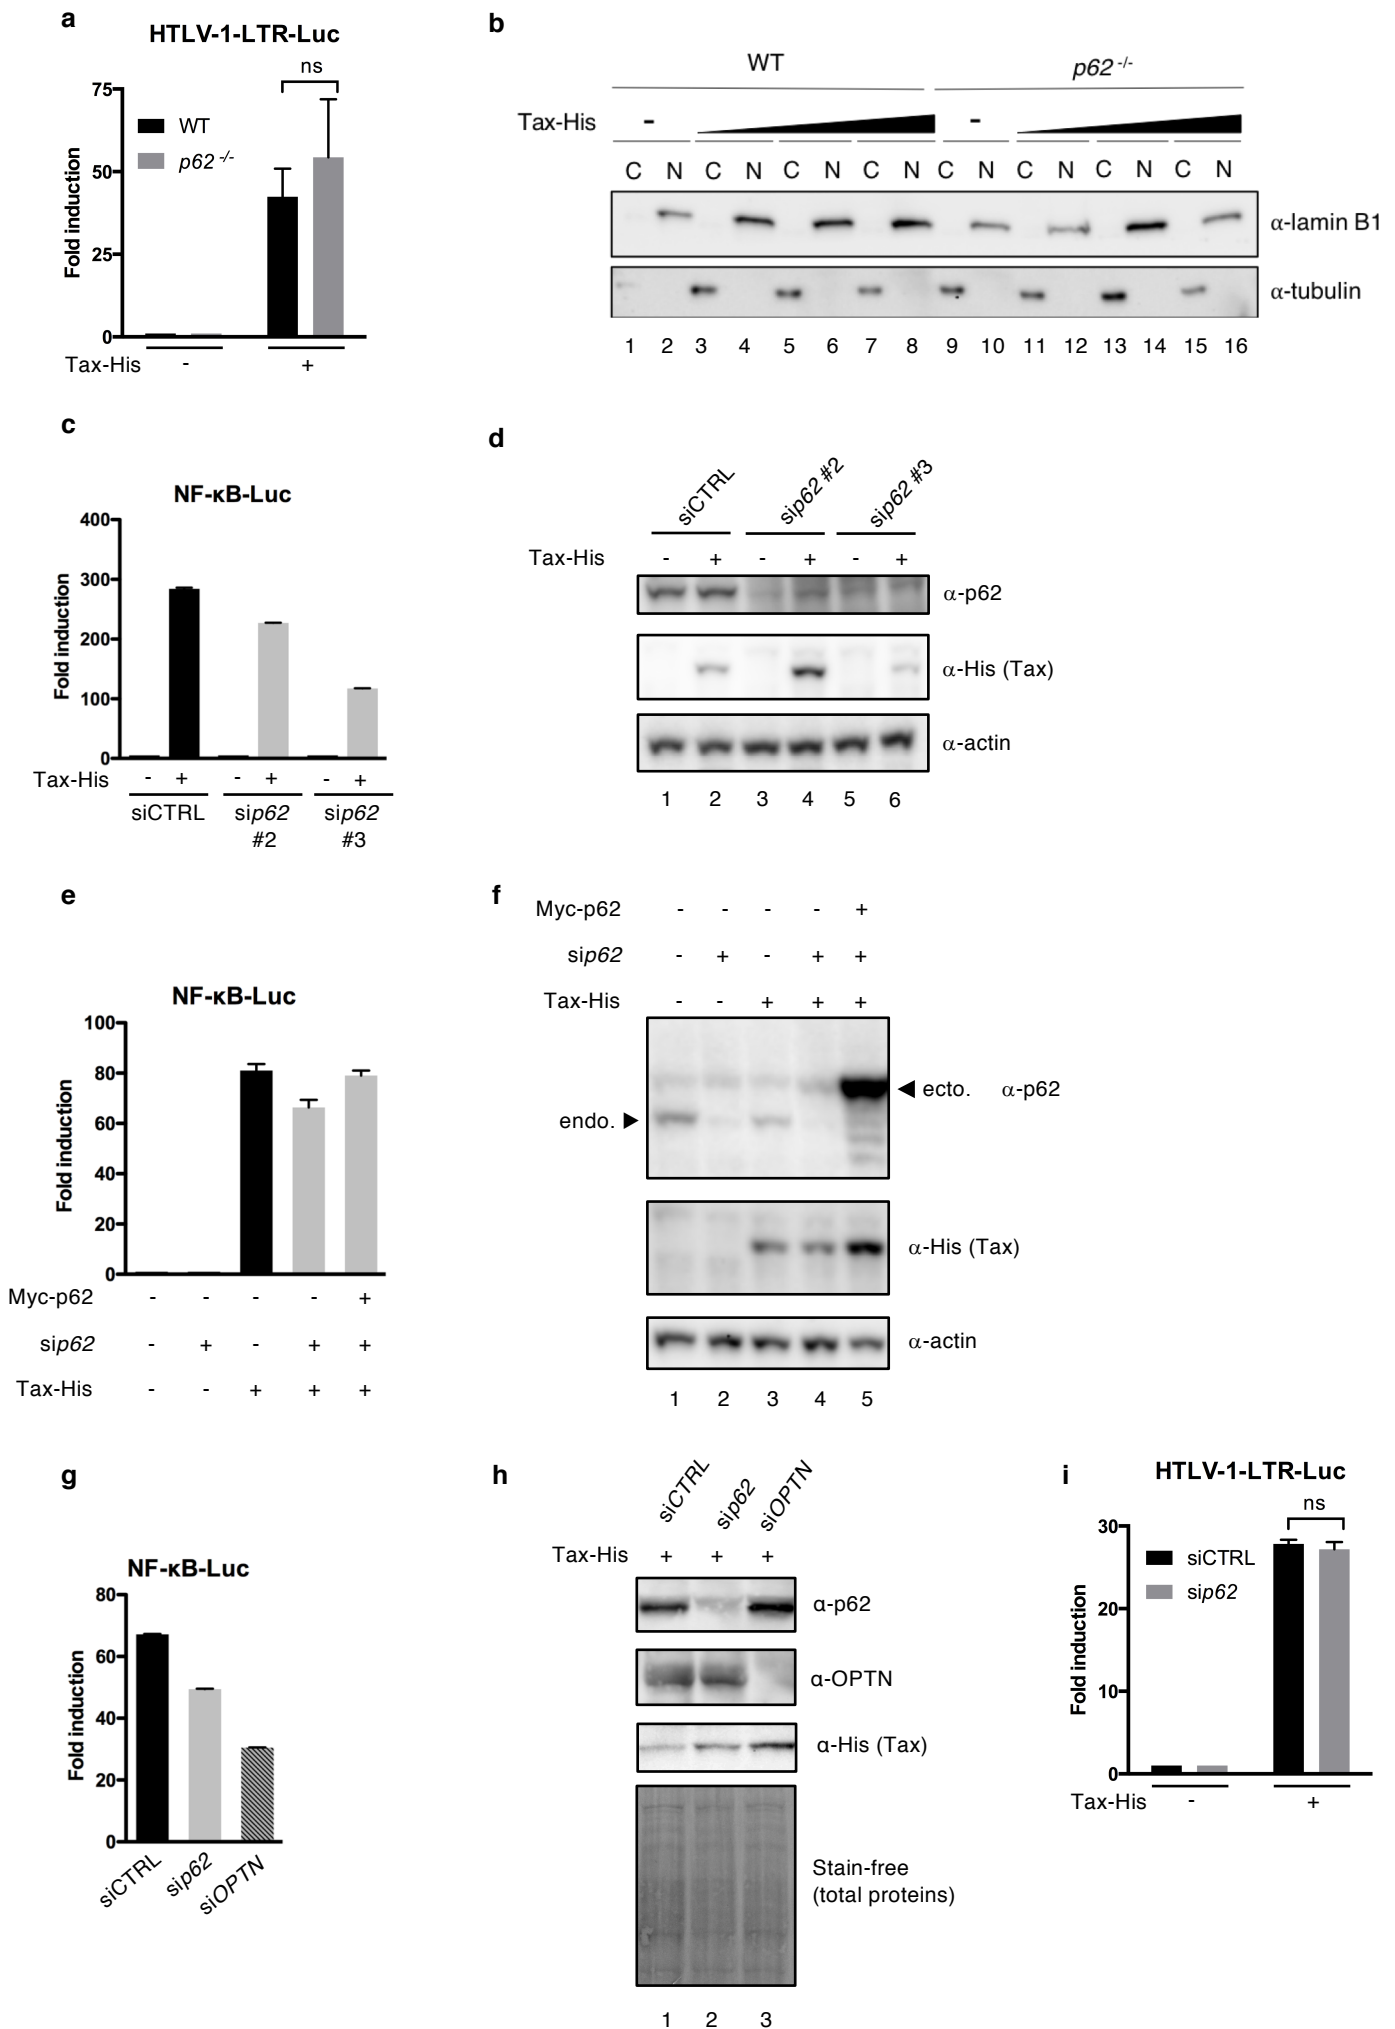

**Supplementary Figure S1. p62 potentiates Tax-dependent NF- $\kappa$ B activation (relative to Fig. 2).**  
See legend on next page.

**Supplementary Figure S1. p62 potentiates Tax-dependent NF- $\kappa$ B activation (relative to Fig. 2).**

(a) Wild type (WT) and *p62*<sup>-/-</sup> MEF cells were transfected with Tax-His, together with an HTLV-1-LTR-luc construct. Luciferase activity was measured and normalized over the corresponding Tax-negative condition. The graph shows results from at least 3 independent experiments. (b) Lysates from WT and *p62*<sup>-/-</sup> MEF cells were analyzed by western blot after cell fractionation. C: cytoplasmic fractions. N: nuclear fractions. (c) HEK293T cells were transfected with control (siCTRL) or two additional *p62*-specific (*sip62* #2 and *sip62* #3) siRNA and Tax-His, together with an NF- $\kappa$ B-luc construct. Luciferase activity was measured and normalized over the corresponding Tax-negative condition. (d) Lysates from HEK293T cells transfected with siCTRL, *sip62* #2, *sip62* #3 and Tax-His were analyzed by western blot. (e) HEK293T cells were transfected with control (-) or *p62*-specific (+) siRNA, Tax-His and ectopic Myc-p62, as indicated, together with an NF- $\kappa$ B-luc construct. Luciferase activity was measured and normalized over the corresponding Tax-negative condition. (f) Lysates from HEK293T cells transfected with siCTRL, *sip62*, Tax-His and ectopic Myc-p62 were analyzed by western blot. (g) HEK293T cells were transfected with control (siCTRL), *p62*-specific (*sip62*) or *OPTN*-specific (si*OPTN*) siRNA and Tax-His, together with an NF- $\kappa$ B-luc construct. Luciferase activity was measured and normalized over the corresponding Tax-negative condition. The graph shows the result from a representative experiment repeated twice. (h) Lysates from HEK293T cells transfected with siCTRL, *sip62* or si*OPTN* and Tax-His were analyzed by western blot. (i) HEK293T cells were transfected with control (siCTRL) or *p62*-specific (*sip62*) siRNA and Tax-His, together with an HTLV-1-LTR-luc construct. Luciferase activity was measured and normalized over the corresponding Tax-negative condition. The graph shows results from at least 3 independent experiments. ns,  $p > 0.05$  (one-way ANOVA with Bonferroni *post-hoc* test). Full-length blots are presented in Supplementary Figure S4.

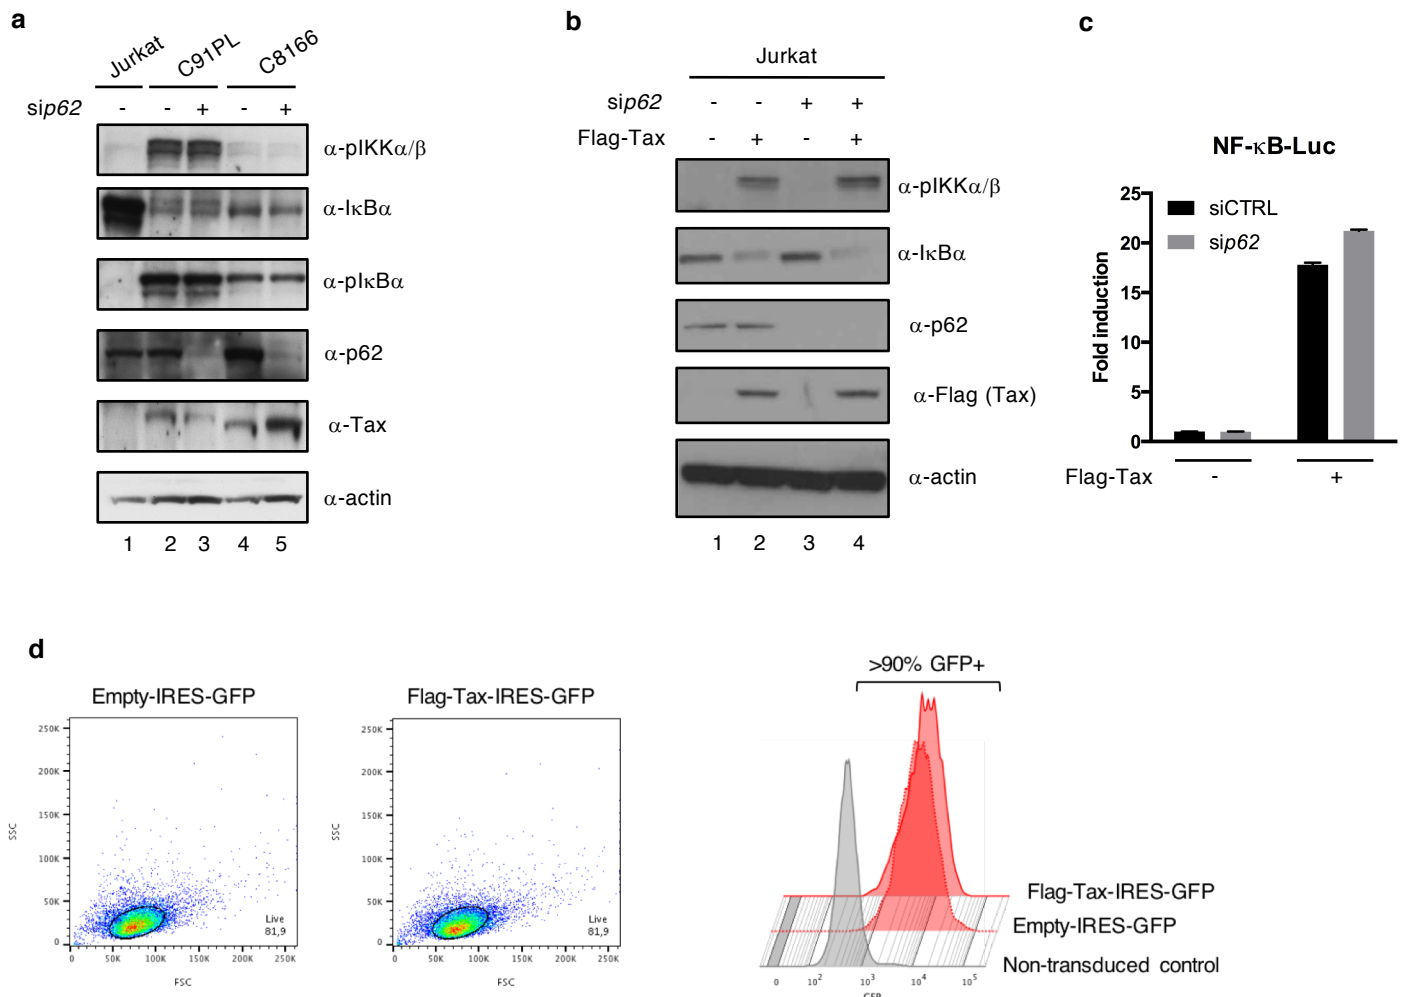

**Supplementary Figure S2. Analysis of p62 activity on Tax-dependent NF- $\kappa$ B activation in T cells (relative to Fig. 2).**

(a) Non-infected T cells (Jurkat) and HTLV-1 chronically infected cells (C91PL and C8166) were transfected with control (-) or *p62*-specific (+) siRNA for 48 hours. Cell lysates were analyzed by western blot. (b-c) Jurkat T cells were transfected with control (-) or *p62*-specific (+) siRNA and an NF- $\kappa$ B-luc construct, followed by transduction with an empty or Flag-Tax-encoding lentivector. (b) Lysates were analyzed by western blot. (c) Luciferase activity was measured and normalized to the corresponding Tax-negative condition (set to 1). The graph is representative from 2 independent experiments. (d) Jurkat cells were transfected with increasing amounts of Myc-p62 and an NF- $\kappa$ B-luc construct, followed by transduction with an empty or Flag-Tax-encoding lentivector, which also encodes GFP after an IRES. Cells were analyzed by flow cytometry to determine the proportion of live cells (FCS/SSC panel) and of GFP-positive (GFP+) transduced cells. Full-length blots are presented in Supplementary Figure S4.

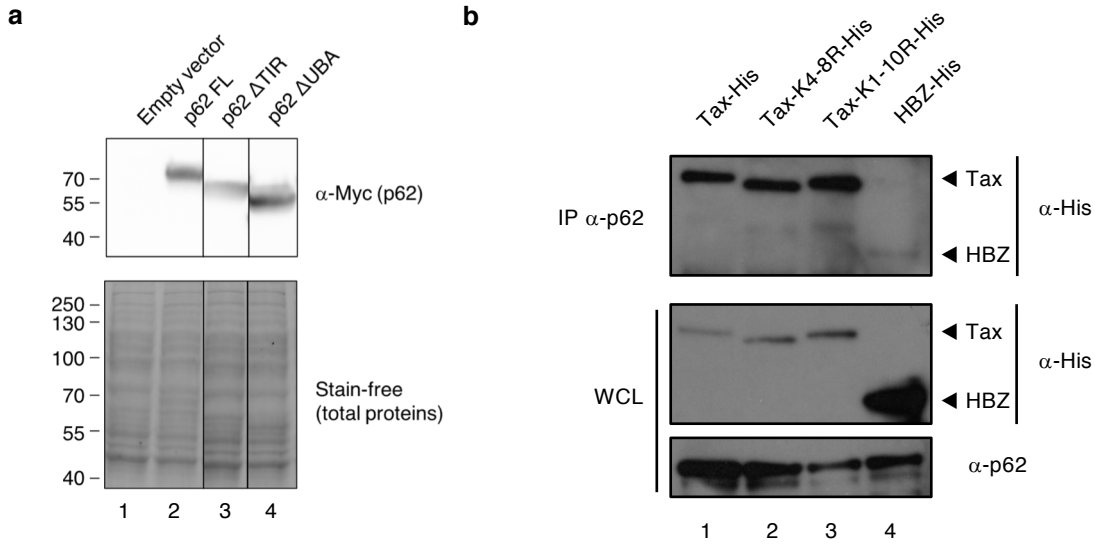

**Supplementary Figure S3. p62 binding to ubiquitin is required for p62 potentiation of Tax-mediated NF- $\kappa$ B activation (relative to Fig. 6).**

(a) Cells were transfected with full-length Myc-p62 (My-p62 FL) or p62 mutants in which the Tax-interacting region (Myc-p62  $\Delta$ 170-221) or the ubiquitin-binding domain (Myc-p62  $\Delta$ UBA) were deleted, and cell lysates were analyzed by western blot. The vertical lines separate several parts of a single membrane. (b) Lysates from HeLa cells transiently expressing wild type Tax-His, ubiquitination-defective Tax-K4-8R-His and Tax-K1-10R-His or HBZ-His were immunoprecipitated with a p62-specific antibody followed by western blot analyses. Full-length blots are presented in Supplementary Figure S4.

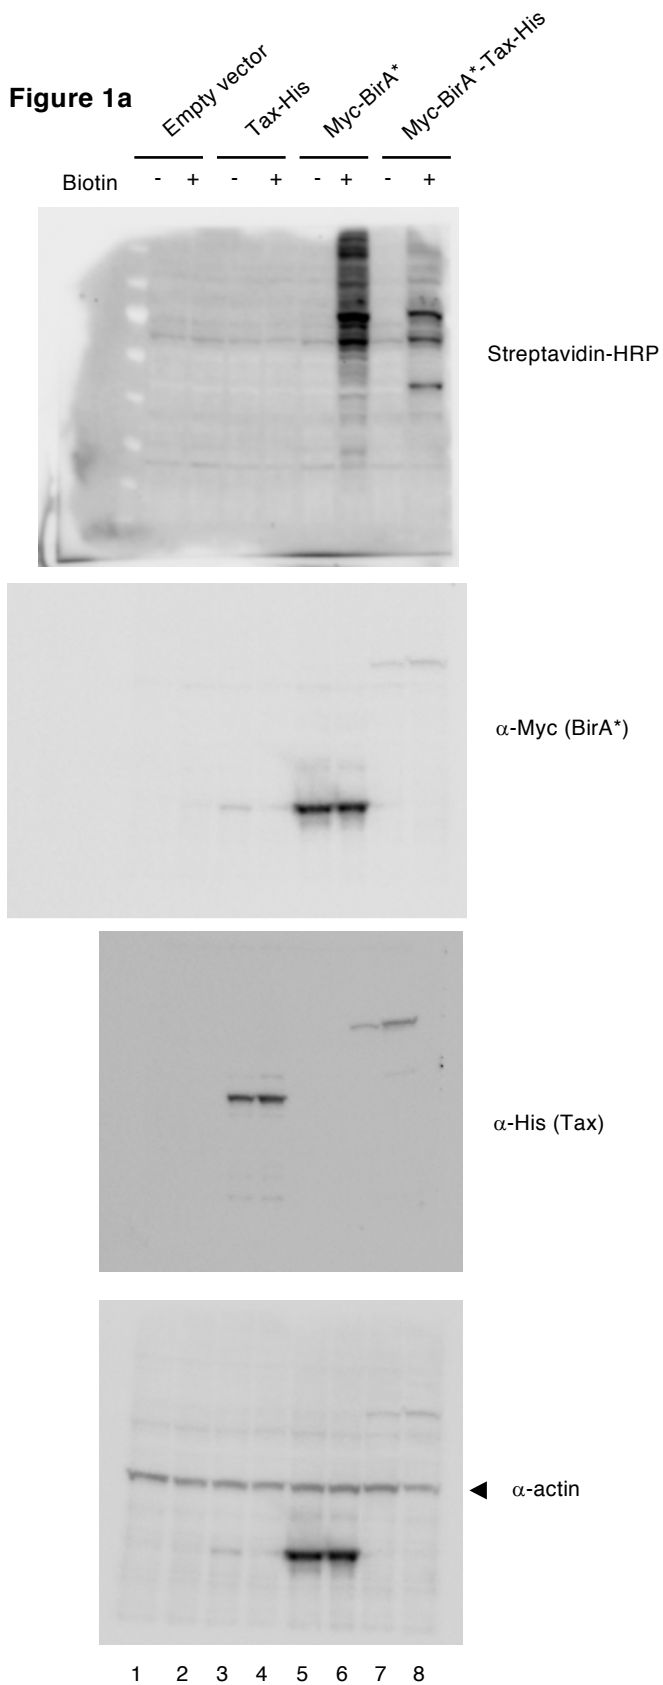

**Figure 1d**

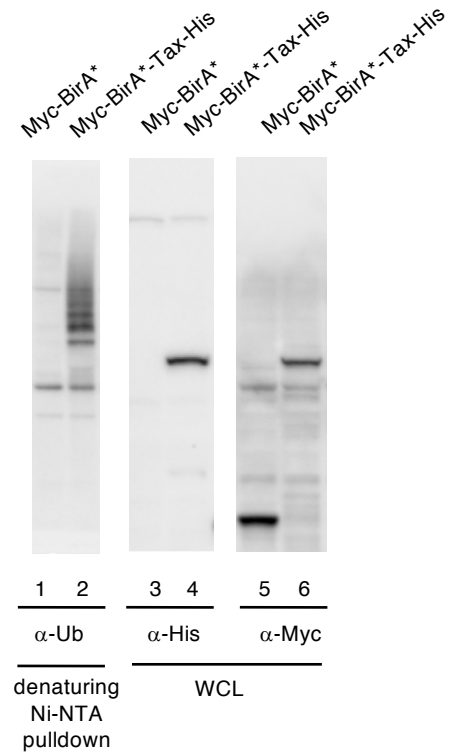

Figure 1f

JK : Jurkat cells, negative control  
Hut: HuT102  
C81: C8166  
C91: C91PL

WCL (inputs)

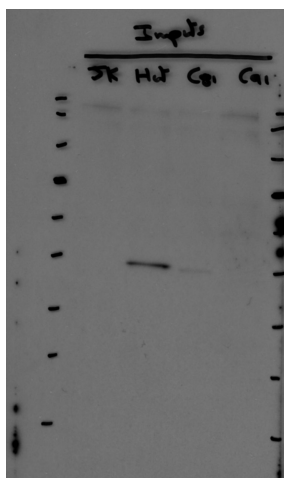

short exposure

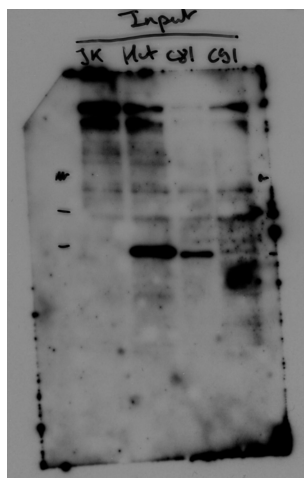

long exposure

WB  $\alpha$ -Tax

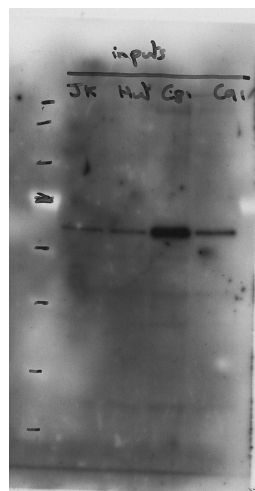

WB  $\alpha$ -p62

IP  $\alpha$ -p62 (IP) or control Ig (Ig)

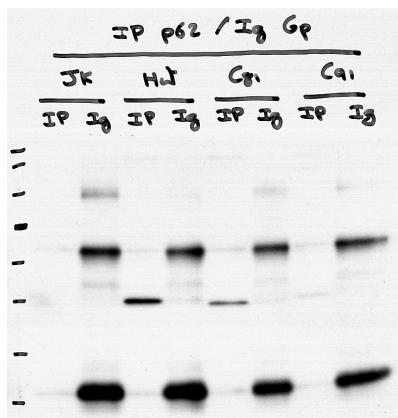

short exposure

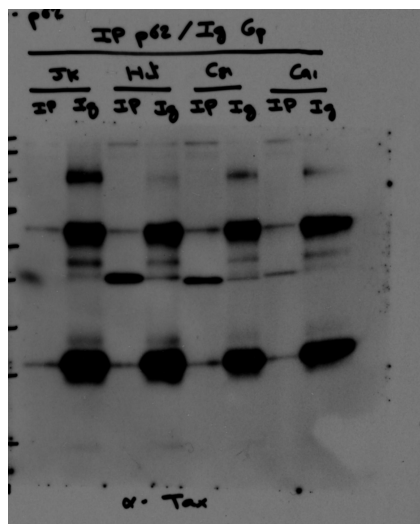

long exposure

WB  $\alpha$ -Tax

IP  $\alpha$ -Tax or control Ig (Ig)

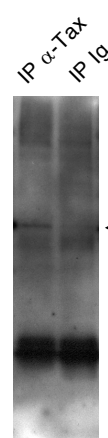

$\alpha$ -p62

**Figure 2c**

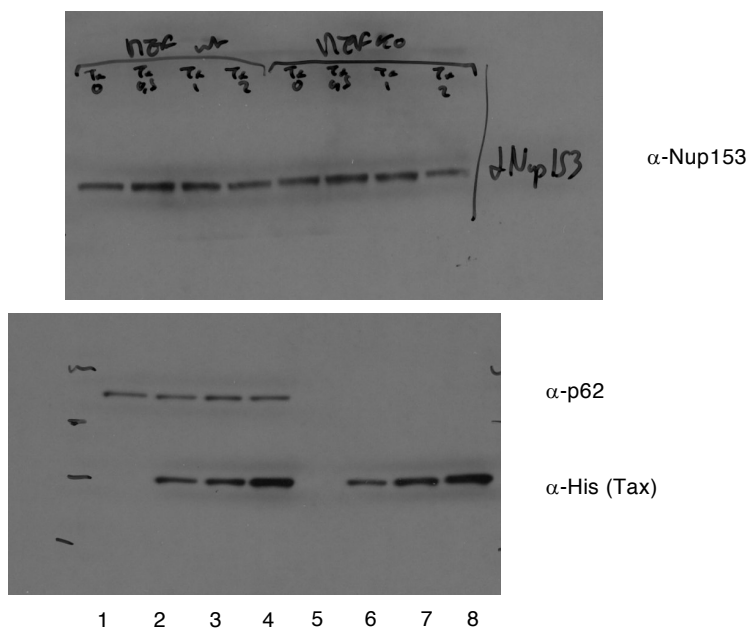

**Figure 2d**

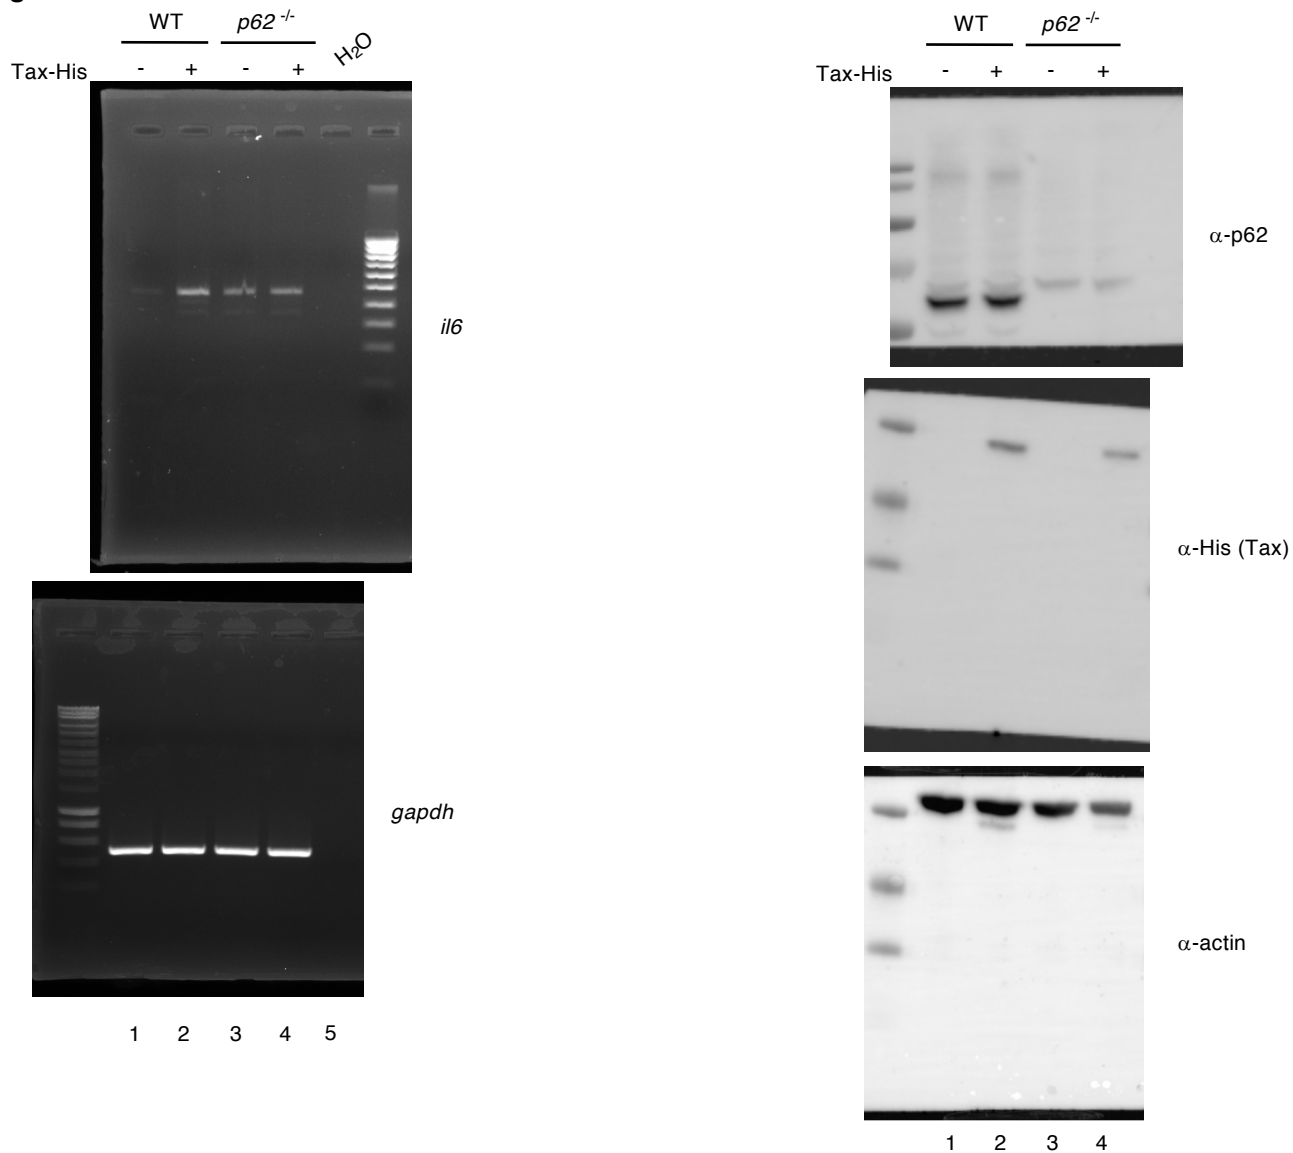



**Figure 2f**

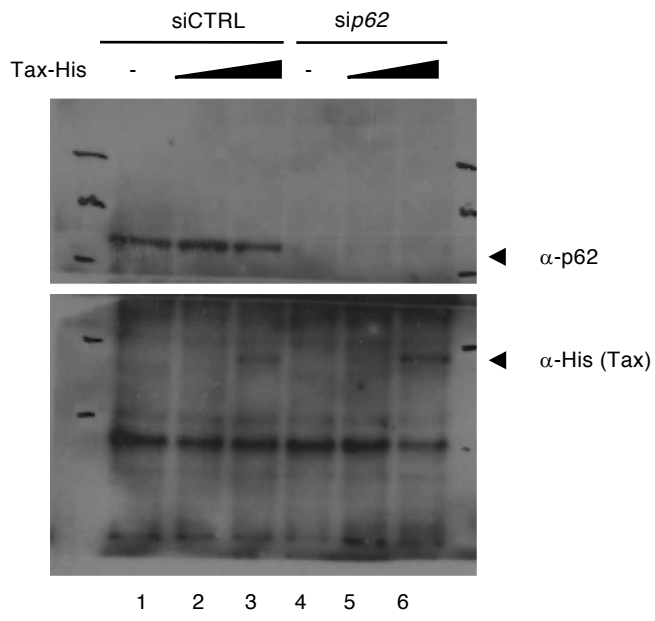

**Figure 2h**

G: Empty-IRES-GFP lentivector  
T: Flag-Tax-IRES-GFP lentivector

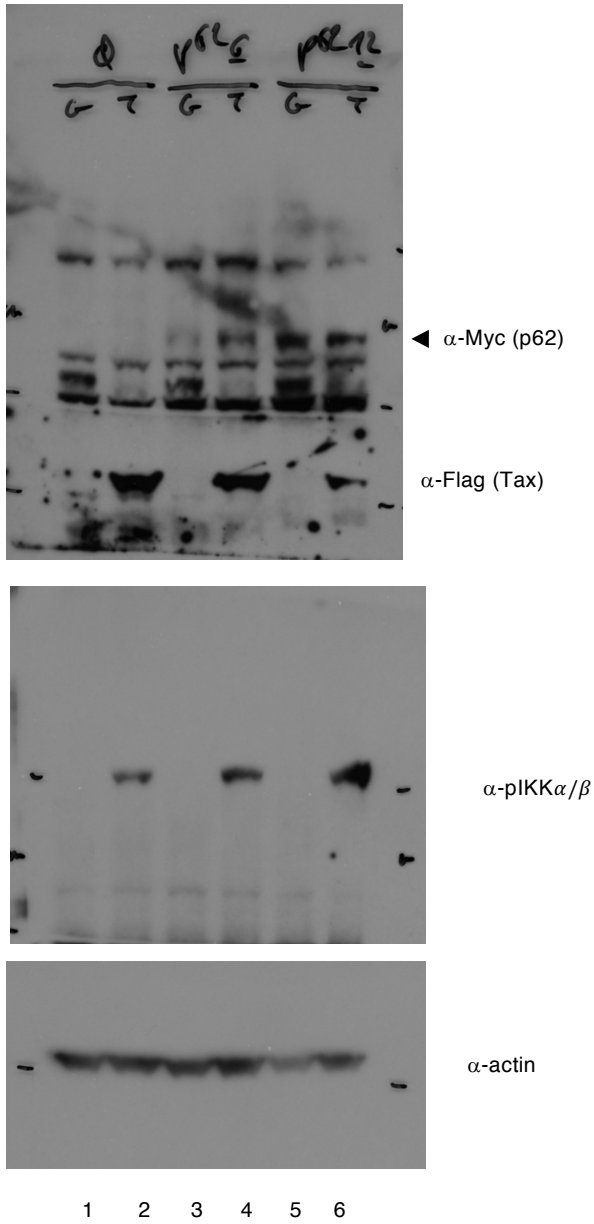

**Figure 3c**

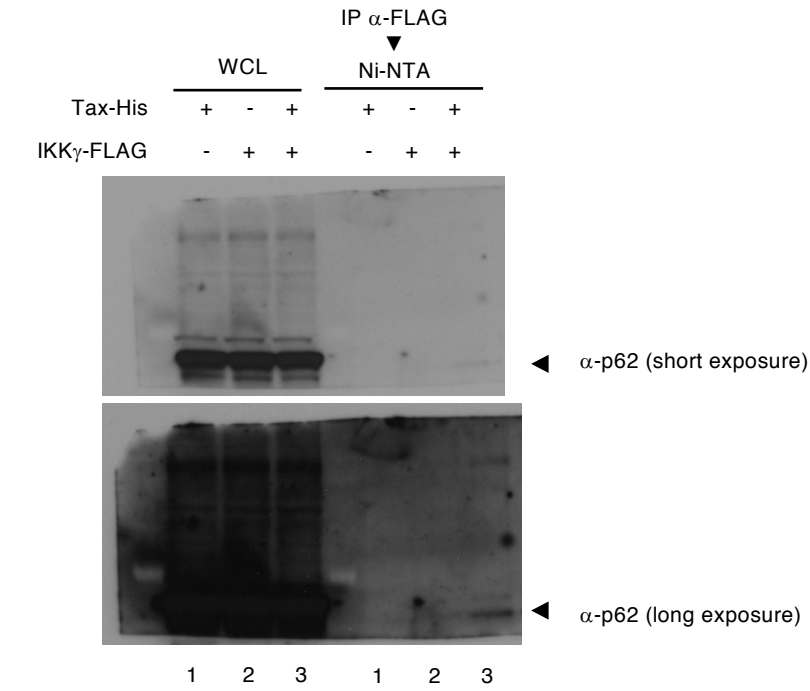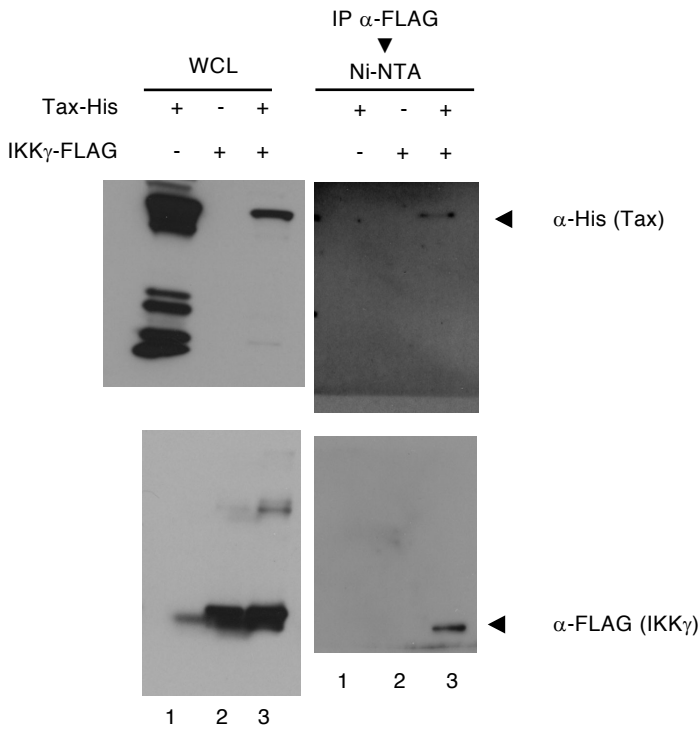

**Figure 4b**

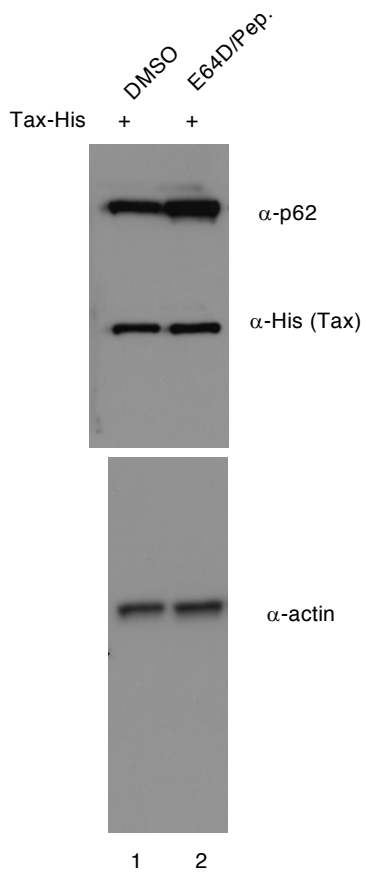

**Figure 4c**

D: DMEM  
H: HBSS

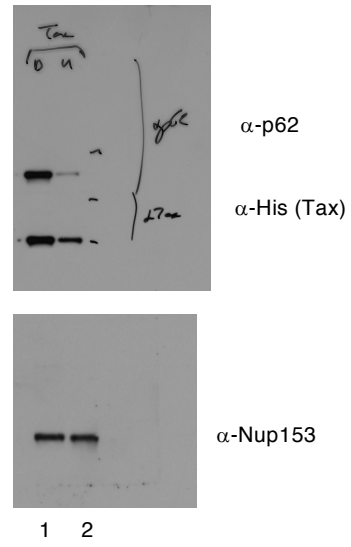

**Figure 6b**

|                          |   |   |   |   |   |
|--------------------------|---|---|---|---|---|
| Myc-p62 $\Delta$ 170-221 | - | - | + | - | + |
| Myc-p62 FL               | - | + | - | + | - |
| Tax-His                  | + | - | - | + | + |

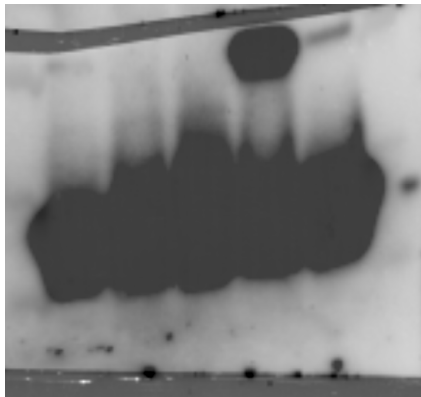

$\alpha$ -His (Tax)  
*long exposure*

IP  $\alpha$ -Myc

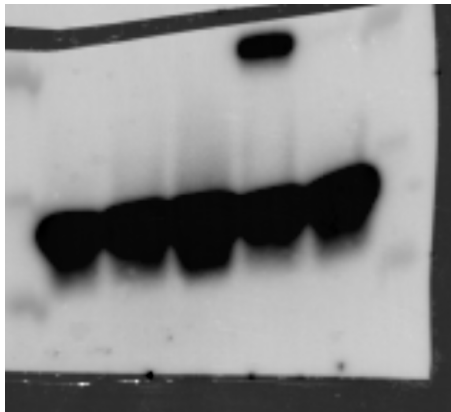

$\alpha$ -His (Tax)  
*short exposure*

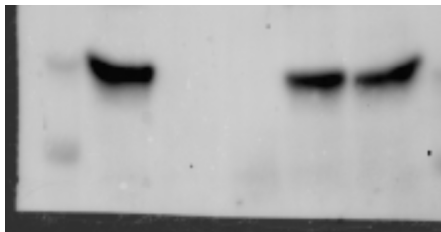

$\alpha$ -His (Tax)

WCL

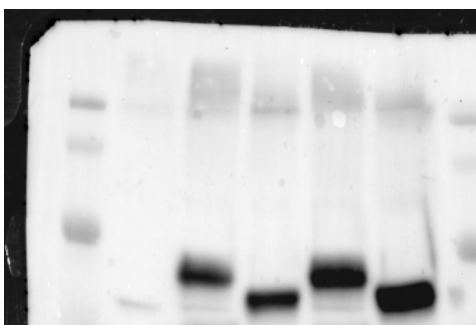

$\alpha$ -Myc (p62)

1 2 3 4 5

**Figure 6c**

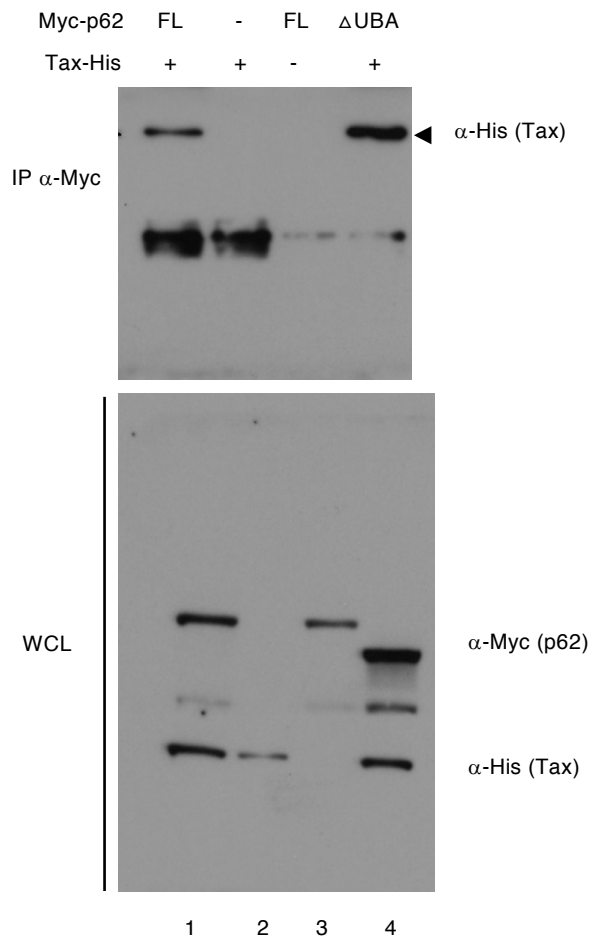

**Figure 6d**

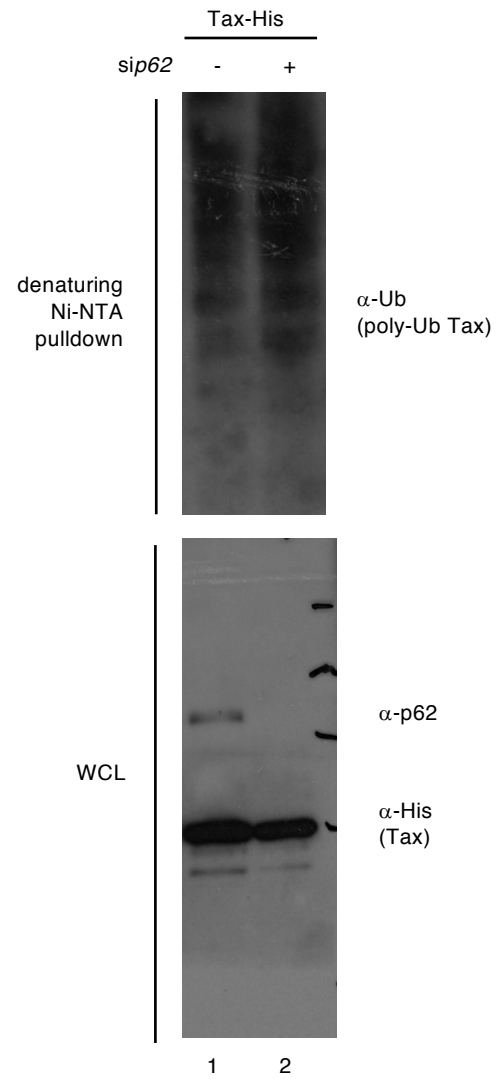

**Figure 6e**

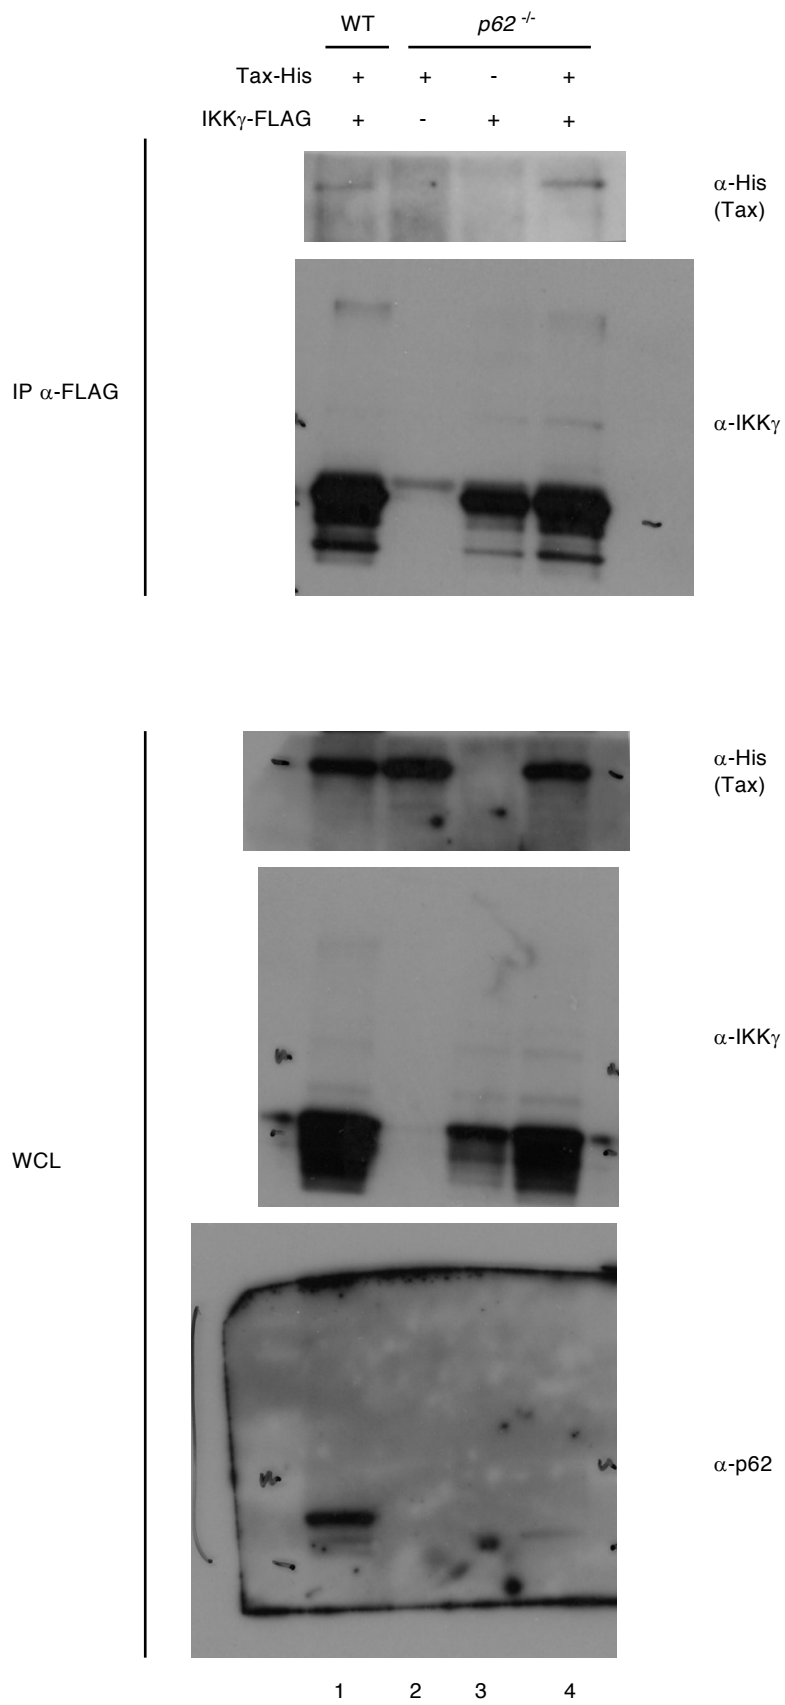

Supp Figure S1b

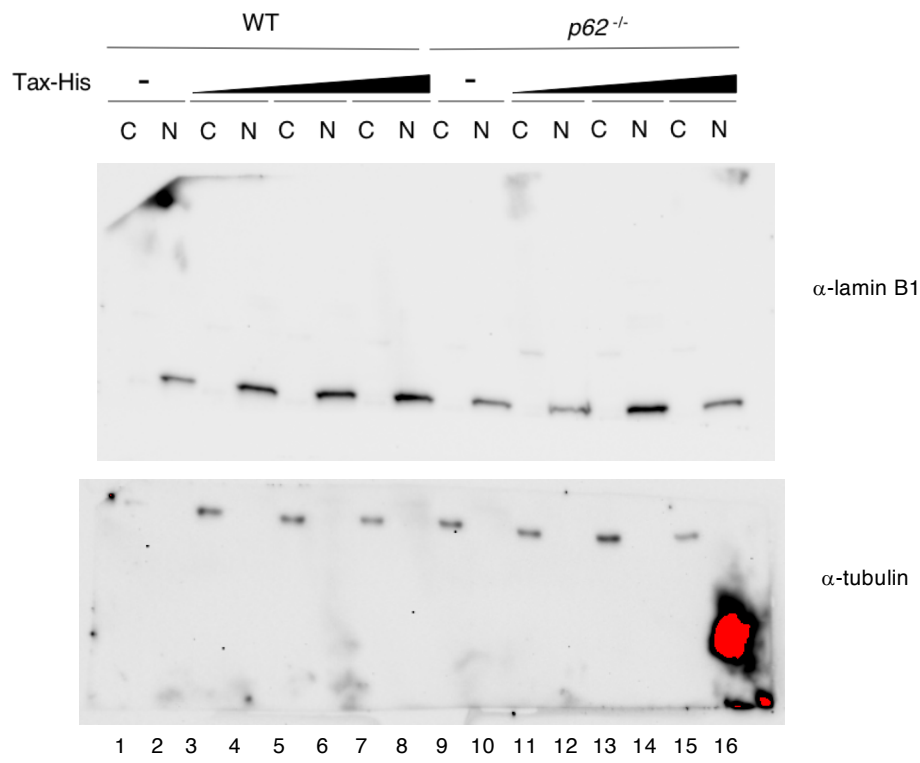



Supp Figure S1d

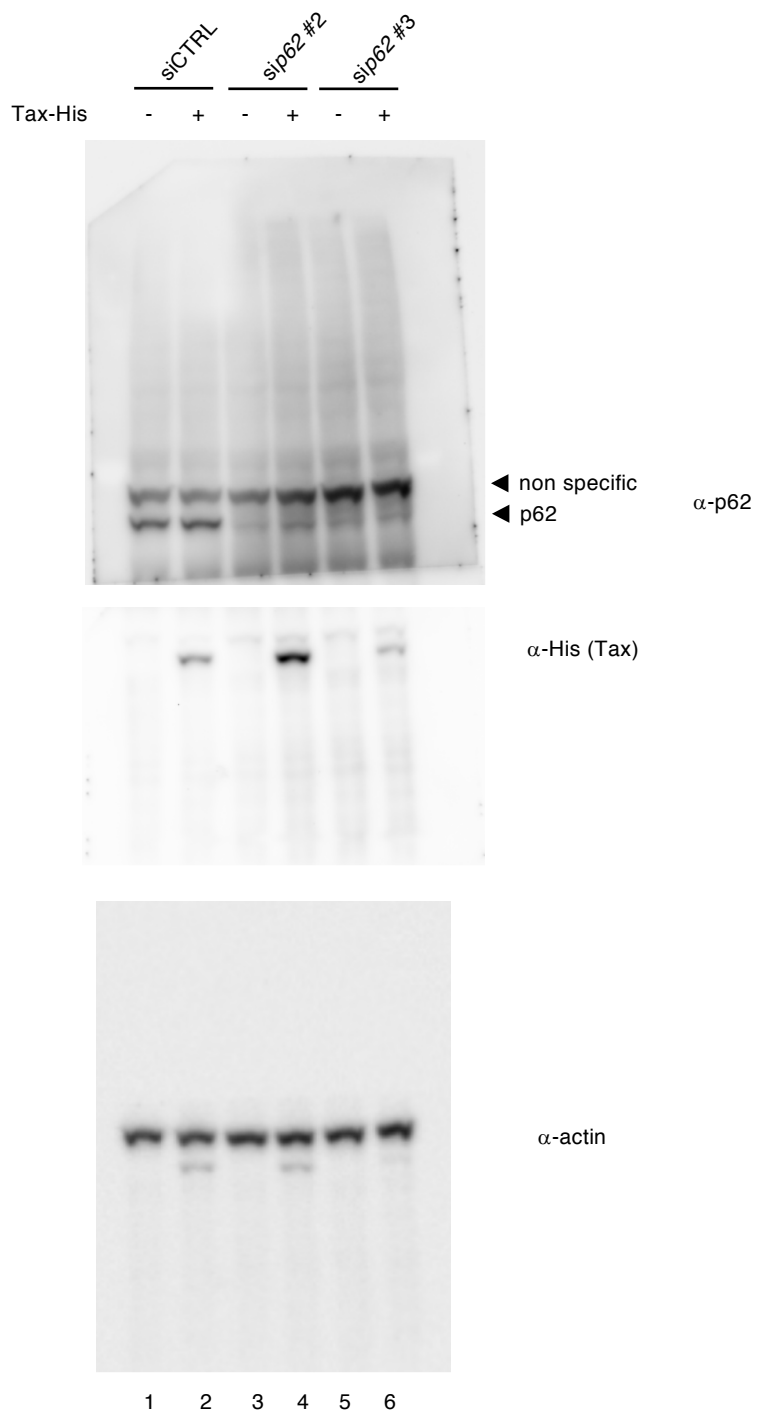

**Supp Figure S1f**

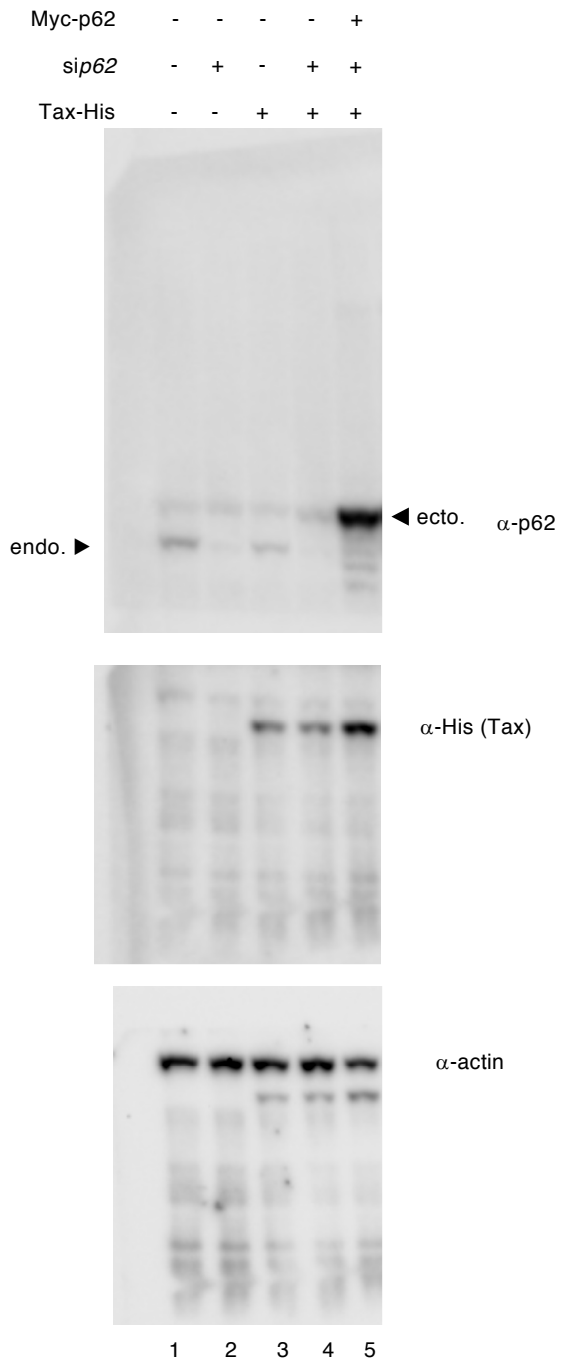

Supp Figure S1h

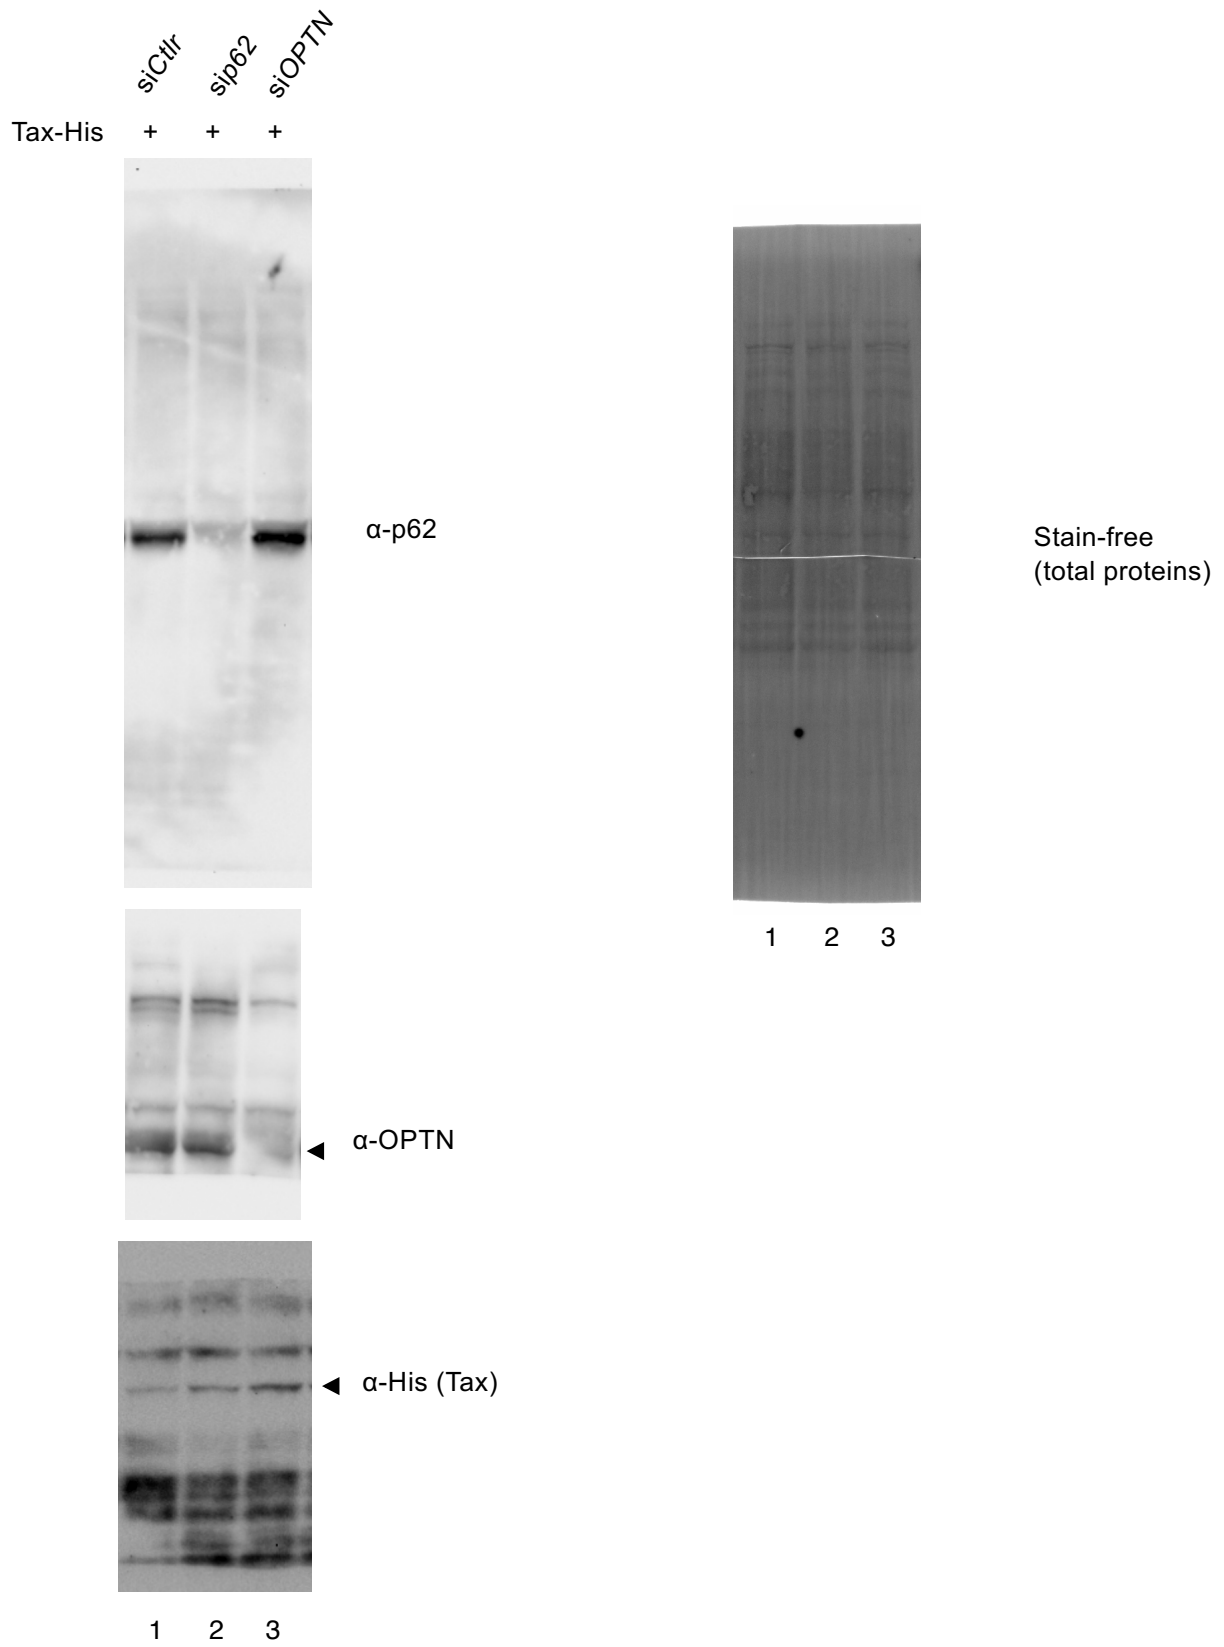

Supp Figure S2a

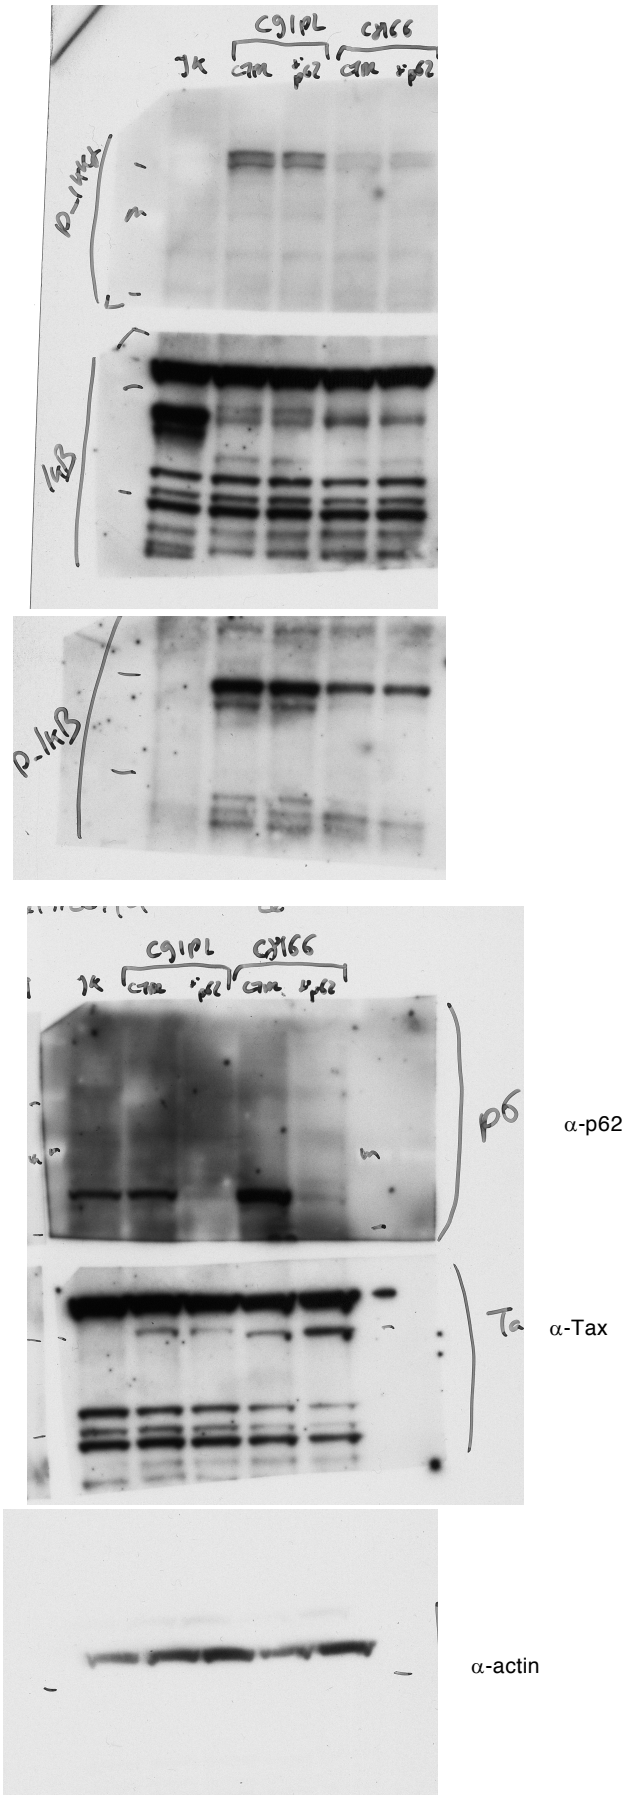

Supp Figure S2b

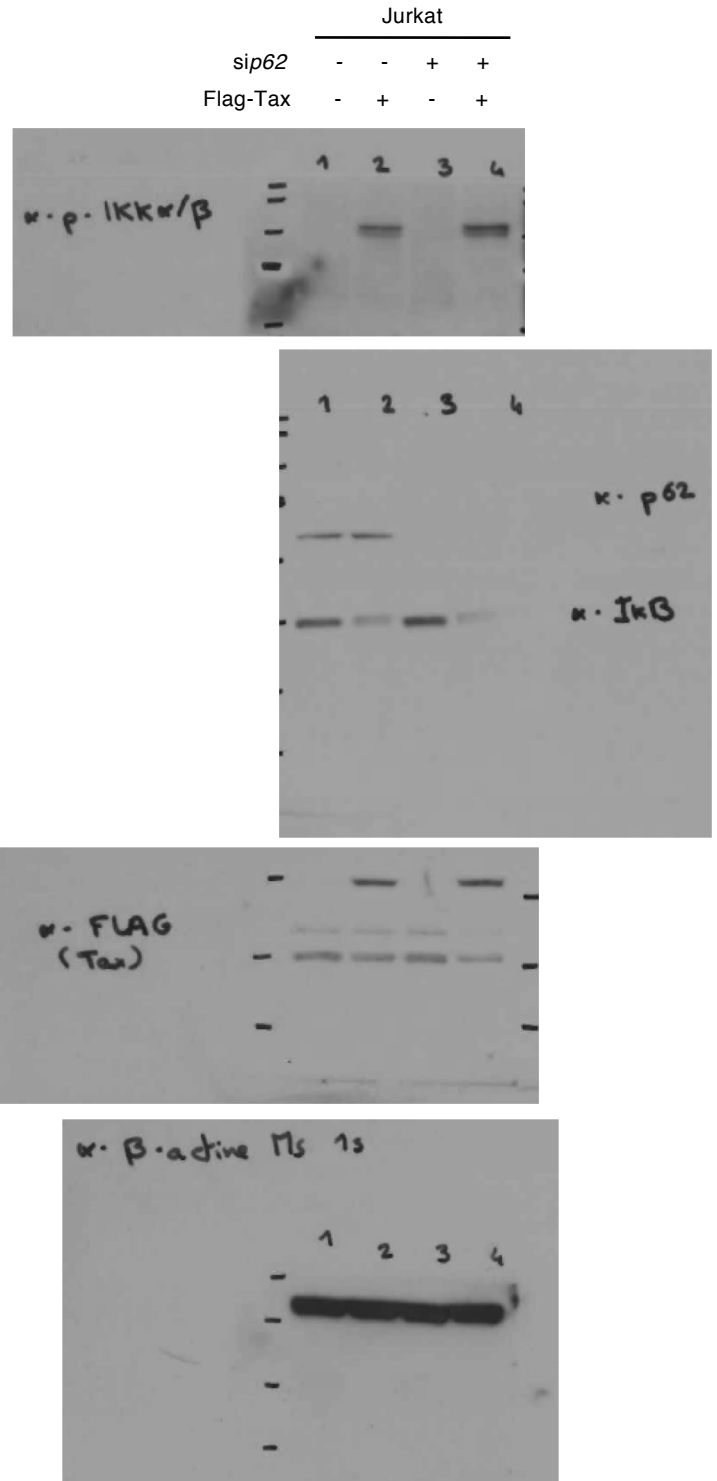

**Supp Figure S3a**

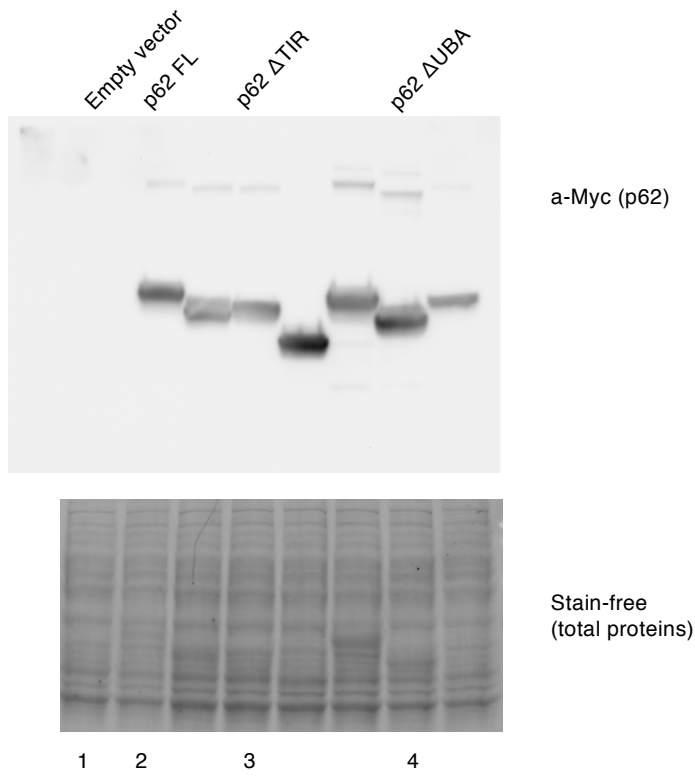

**Supp Figure S3b**

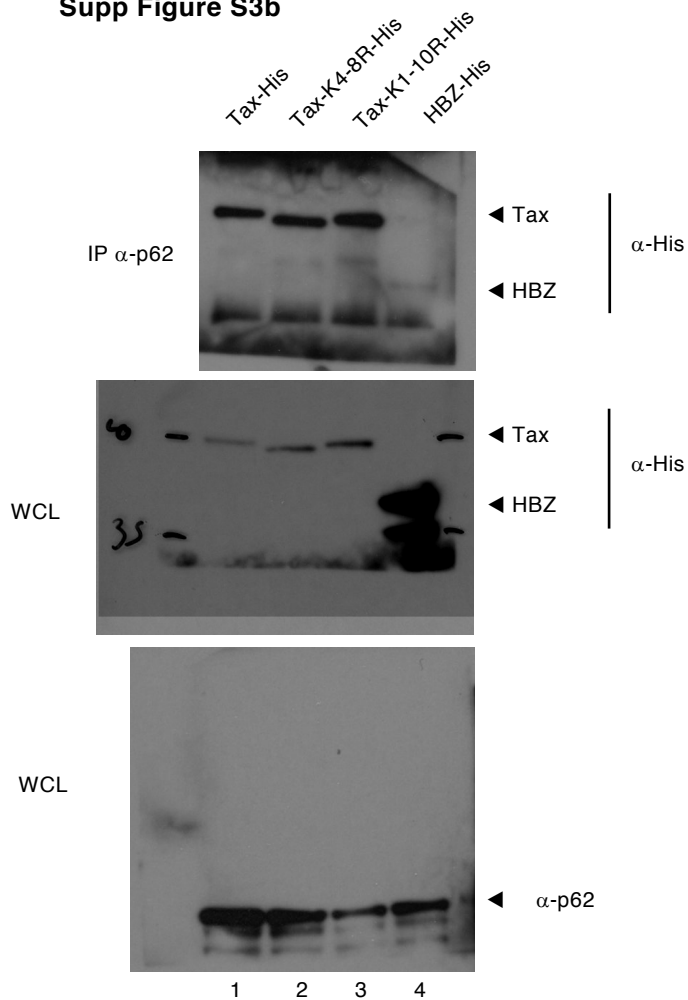

Supplement: 41598_2019_52408_MOESM1_ESM.pdf [file 41598_2019_52408_MOESM1_ESM.pdf]
